# Supplementary material for: Using motivational interviewing to reduce parental risk related behaviors for early childhood caries: a pilot study
Source: Springer Nature journal article supplement (doi:10.1186/s12903-020-1052-6), 2020-03-29

## Flow Diagram

### Reducing Parental Risk Related Behaviors for ECC

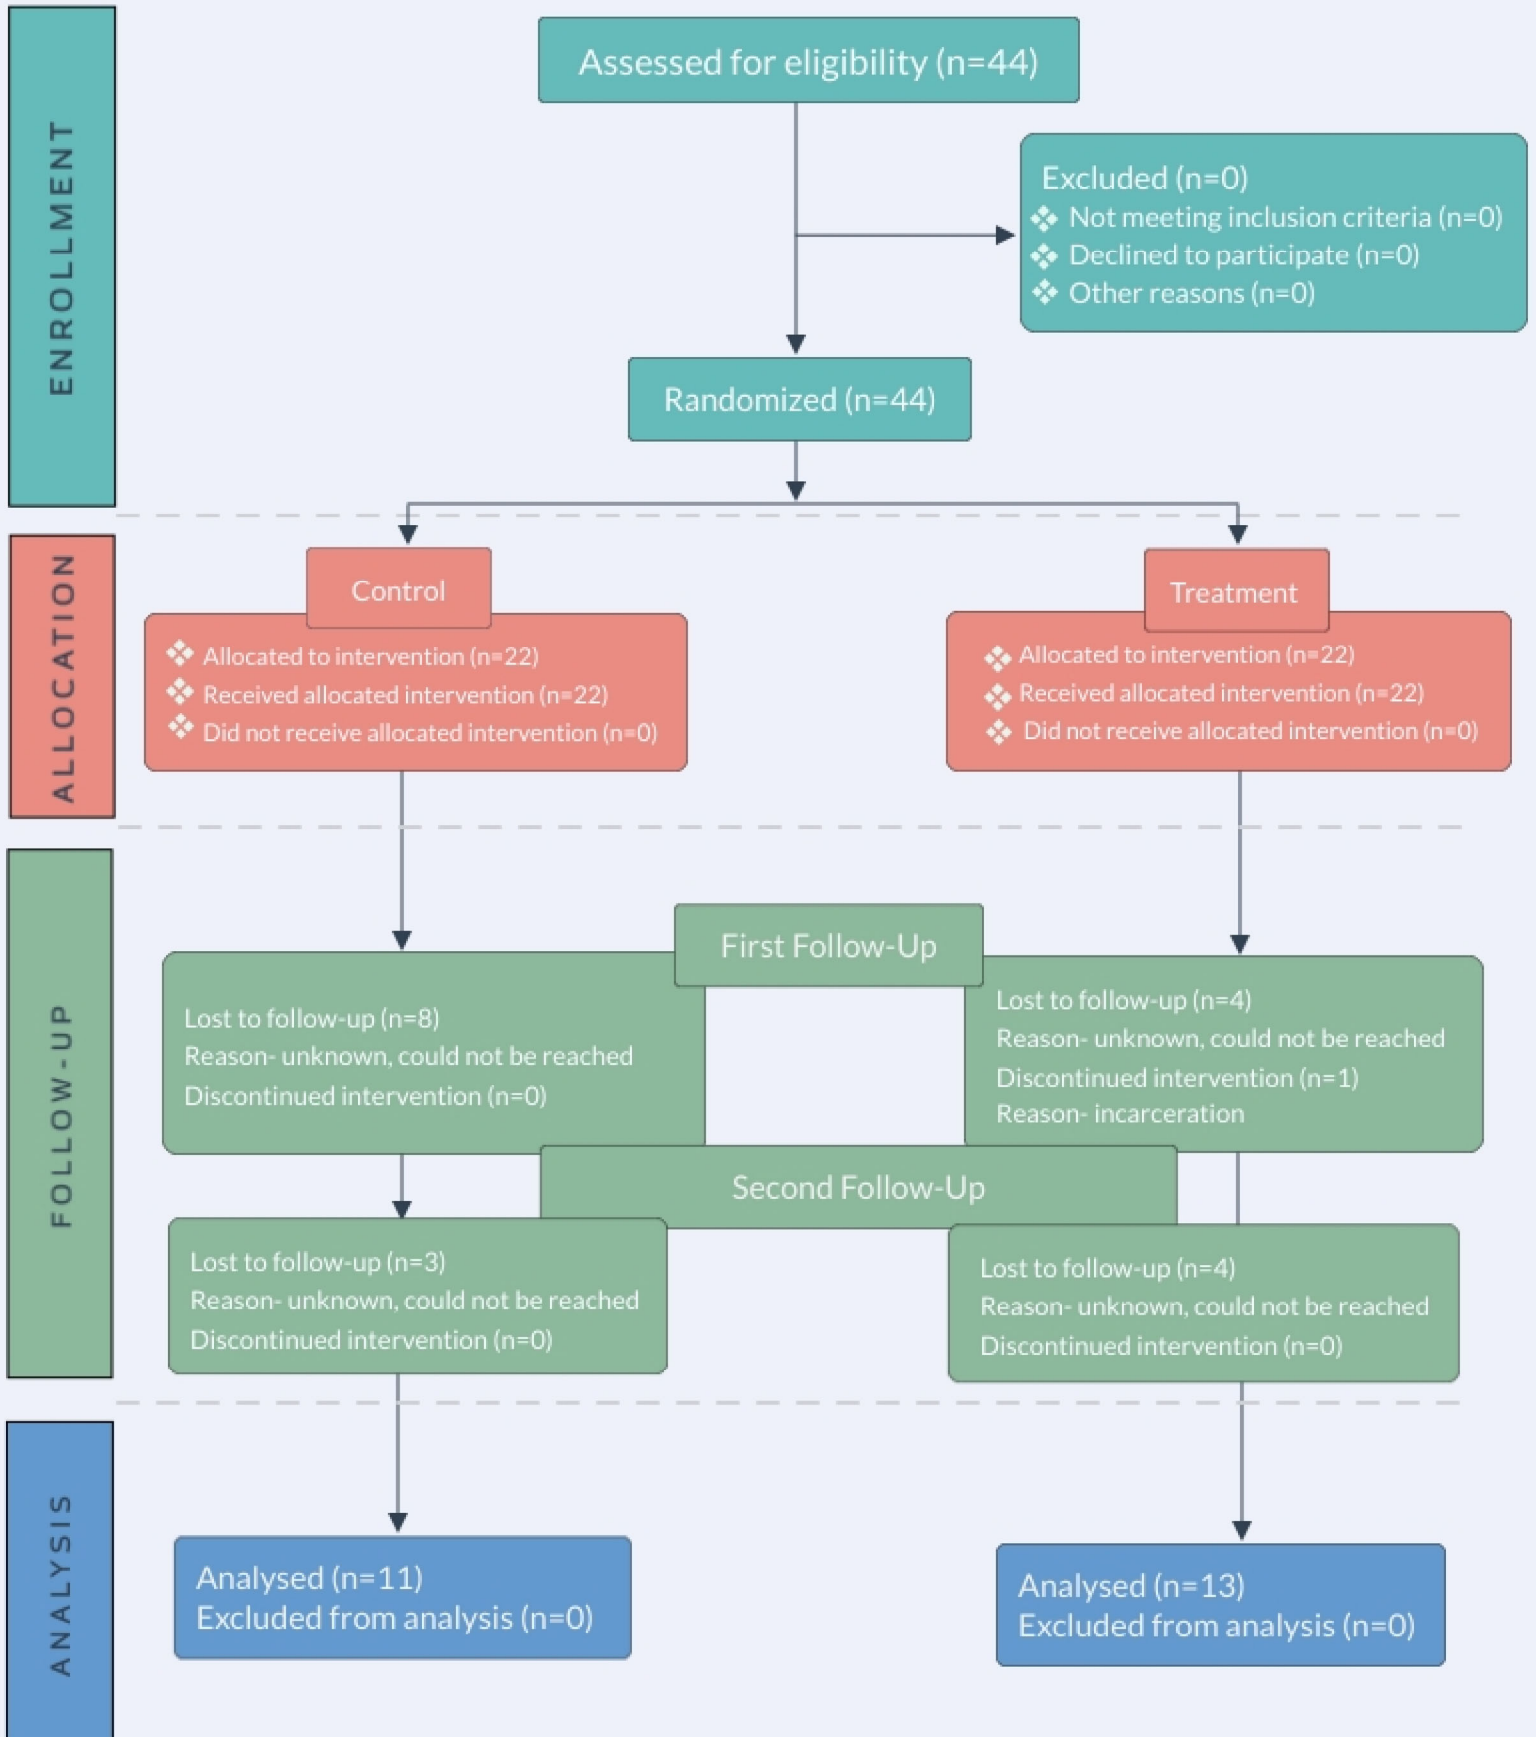

Supplement: MOESM1 [file 17841564]
